# Supplementary material
Source: MDPI journal article supplement (https://www.mdpi.com/2076-3263/2/4/235)
Supplement: s1 [file s1]

Archive with 3 entries (3 files):
- geosciences-19641-supplementary.pdf
- oxic_migration.mp4
- anoxic_migration.mp4
